# Supplementary material for: Expanding access to high-cost medicines through the E2 access program in Thailand: effects on utilisation, health outcomes and cost using an interrupted time-series analysis
Source: PubMed Central journal article supplement — BMJ Open. 2016 Mar 17;6(3):e008671. doi: 10.1136/bmjopen-2015-008671 (PMC4800146; doi:10.1136/bmjopen-2015-008671), 2016-03-17
Supplement: bmjopen-2015-008671supp_appendix1.pdf [file bmjopen-2015-008671supp_appendix1.pdf]

**Supplementary appendix 1** Eligibility criteria for E2 medicines<sup>#</sup>

| E2 medicines             | Indication                                | Diagnosis (ICD-10)                                                                                                                                              | Clinical criteria/Laboratory test results                                                                                                                                                                                                                                                                                                                                                                                                                        | Prior treatment requirement                                                                                                                                                                                                                               |
|--------------------------|-------------------------------------------|-----------------------------------------------------------------------------------------------------------------------------------------------------------------|------------------------------------------------------------------------------------------------------------------------------------------------------------------------------------------------------------------------------------------------------------------------------------------------------------------------------------------------------------------------------------------------------------------------------------------------------------------|-----------------------------------------------------------------------------------------------------------------------------------------------------------------------------------------------------------------------------------------------------------|
| Botulinum A toxin        | Cervical dystonia                         | G24.3                                                                                                                                                           |                                                                                                                                                                                                                                                                                                                                                                                                                                                                  | <ul style="list-style-type: none"> <li>○ Clonazepam ⇨ Clonamil , Rivotril, Povamil</li> <li>○ Amitriptyline ⇨ Triptyline</li> <li>○ Fulnarizine ⇨ Fludan, Liberal</li> <li>○ Carbamazepine ⇨ Tegretol</li> <li>○ Baclofen ⇨ Liobac</li> </ul>             |
| Botulinum A toxin        | Hemifacial spasm                          | G51.3                                                                                                                                                           |                                                                                                                                                                                                                                                                                                                                                                                                                                                                  | <ul style="list-style-type: none"> <li>○ Clonazepam ⇨ Clonamil , Rivotril, Povamil</li> <li>○ Amitriptyline ⇨ Triptyline</li> <li>○ Fulnarizine ⇨ Fludan, Liberal</li> <li>○ Carbamazepine ⇨ Tegretol</li> <li>○ Baclofen ⇨ Liobac</li> </ul>             |
| Leuprorelin acetate      | Central precocious puberty                | E22.8 <ul style="list-style-type: none"> <li>● Girl aged ≤ 8 yr</li> <li>● Boy aged ≤ 9 yr</li> </ul>                                                           | ○ Basal LH > 0.3 – 0.5 IU/L or peak LH after stimulation with GnRH                                                                                                                                                                                                                                                                                                                                                                                               |                                                                                                                                                                                                                                                           |
| Verteporfin              | Age-related Macular Degeneration (AMD)    | H35.3                                                                                                                                                           | ○ Wet AMD ==> no vitamin and receiving laser surgery [ICD-9 CM: 11.3x, 11.4x]                                                                                                                                                                                                                                                                                                                                                                                    |                                                                                                                                                                                                                                                           |
| Liposomal amphotericin B | Invasive fungal infection                 | <ul style="list-style-type: none"> <li>○ B37.x</li> <li>○ B38.x</li> <li>○ B39.x</li> <li>○ B40.x</li> <li>○ B41.x</li> <li>○ B42.x</li> <li>○ B44.x</li> </ul> | <ul style="list-style-type: none"> <li>○ Serum creatinine &gt; 2 times baseline after receiving conventional amphotericin B</li> <li>○ Serum creatinine &gt; 3.0 mg/dL</li> </ul>                                                                                                                                                                                                                                                                                | <ul style="list-style-type: none"> <li>○ Aspergillosis: Amphotericin B /Voriconazole ==&gt; Itraconazole/Caspofungin</li> <li>○ Candidiasis: Amphotericin B ==&gt; IV Fluconazole ==&gt; Caspofungin</li> <li>○ Histoplasmosis: Amphotericin B</li> </ul> |
| IVIG                     | Acute phase of Kawasaki disease (KW)      | M30.3                                                                                                                                                           | <ul style="list-style-type: none"> <li>○ Fever persisting at least 5 days and 4 of 5 following criteria</li> <li>▪ Changes in extremities acute: Erythema of palms, soles; edema of hands, feet</li> <li>▪ Polymorphous exanthema</li> <li>▪ Bilateral bulbar conjunctiva injection without exudate</li> <li>▪ Changes in lips and oral cavity: Erythema, lips cracking, strawberry tongue</li> <li>▪ Cervical lymphadenopathy (&gt; 1.5-cm diameter)</li> </ul> |                                                                                                                                                                                                                                                           |
| IVIG                     | Idiopathic Thrombocytopenic Purpura (ITP) | D69.3 <ul style="list-style-type: none"> <li>○ Intracranial: I60.x , I61.x, I62.x, P52.0</li> <li>○ Gastro-intestinal:</li> </ul>                               | ○ Platelet count ≤ 20000 /mm <sup>3</sup>                                                                                                                                                                                                                                                                                                                                                                                                                        |                                                                                                                                                                                                                                                           |

| E2 medicines | Indication                              | Diagnosis (ICD-10)                                                                                                       | Clinical criteria/Laboratory test results                                                                                                                                                                                                                                                                           | Prior treatment requirement                                                                                                                                                 |
|--------------|-----------------------------------------|--------------------------------------------------------------------------------------------------------------------------|---------------------------------------------------------------------------------------------------------------------------------------------------------------------------------------------------------------------------------------------------------------------------------------------------------------------|-----------------------------------------------------------------------------------------------------------------------------------------------------------------------------|
|              |                                         | K92.0, K92.2,<br>K66.1, P54.2,<br>P54.3,<br>○ Pulmonary: J94.2,<br>R04.8, P26.x,<br>Other: P52.x, P54.0,<br>P54.8, P54.9 |                                                                                                                                                                                                                                                                                                                     |                                                                                                                                                                             |
| IVIG         | Autoimmune Hemolytic Anemia (AIHA)      | D59.1                                                                                                                    | <ul style="list-style-type: none"> <li>○ Direct Coombs' test positive</li> <li>○ Reticulocyte count increased</li> <li>○ Indirect bilirubin increased</li> </ul>                                                                                                                                                    | ○ Corticosteroid                                                                                                                                                            |
| IVIG         | Hemophagocytic Lymphohistocytosis (HLH) | D67.1                                                                                                                    | <ul style="list-style-type: none"> <li>○ Cytopenias (affecting at least 2 of 3 lineages in the peripheral blood)</li> <li>• Hemoglobin &lt; 9 g/dL (in infants &lt; 4 weeks: hemoglobin &lt; 10 g/dL)</li> <li>• Platelets &lt; 100 x 10<sup>3</sup>/mL</li> <li>• Neutrophils &lt; 1 x10<sup>3</sup>/mL</li> </ul> |                                                                                                                                                                             |
| IVIG         | Guillain-Barré syndrome (GBS)           | G61.0                                                                                                                    | <ul style="list-style-type: none"> <li>○ Respiratory failure or severe weakness with the following clinical presentation:</li> <li>○ Weakness both legs and arms</li> <li>○ Symmetry weakness</li> <li>○ Progressive weakness within 4 weeks</li> <li>○ Autonomic dysfunction</li> <li>○ Facial diplegia</li> </ul> |                                                                                                                                                                             |
| IVIG         | Myasthenia gravis, crisis (MG)          | G70.0                                                                                                                    | <ul style="list-style-type: none"> <li>○ Respiratory failure ICD-10: J96.x with these following clinical presentation</li> <li>○ Ptosis</li> <li>○ Facial palsy</li> <li>○ Oculomotor disturbance</li> <li>○ Proximal muscle weakness</li> <li>○ Unidentified precipitating causes</li> </ul>                       | <ul style="list-style-type: none"> <li>○ Mestinon</li> <li>○ Azathioprine</li> <li>○ Cyclophosphamide</li> </ul>                                                            |
| IVIG         | Pemphigus vulgaris (PV)                 | L10.0                                                                                                                    | <ul style="list-style-type: none"> <li>○ Involvement &gt; 30% of body surface area</li> </ul>                                                                                                                                                                                                                       | <ul style="list-style-type: none"> <li>○ Steroid (prednisolone)</li> <li>○ Steroid (prednisolone) + oral immunosuppressant</li> <li>○ IV steroid + pulse therapy</li> </ul> |
| IVIG         | Primary Immune Deficiency disease (PID) | D80.x, D81.x, D82.x,<br>D83.x, D84.x, D86.x,<br>D89.x                                                                    |                                                                                                                                                                                                                                                                                                                     |                                                                                                                                                                             |

IV: Intravenous; LH: Luteinizing hormone; GnRH: Gonadotropin-releasing hormone; IVIG: human immunoglobulin G

#The criteria were developed based on E2 program eligibility criteria for the medicines and confirmed with specialty clinical practice.
