# Supplementary material for: Expanding access to high-cost medicines through the E2 access program in Thailand: effects on utilisation, health outcomes and cost using an interrupted time-series analysis
Source: PubMed Central journal article supplement — BMJ Open. 2016 Mar 17;6(3):e008671. doi: 10.1136/bmjopen-2015-008671 (PMC4800146; doi:10.1136/bmjopen-2015-008671), 2016-03-17
Supplement: bmjopen-2015-008671supp_appendix2.pdf [file bmjopen-2015-008671supp_appendix2.pdf]

**Supplementary appendix 2:** Criteria for significant improvement in clinical outcomes by E2 medicine and indication

| <b>E2 medicines</b>      | <b>Indications</b>        | <b>Significant clinical improvement criteria</b>                                                                                                                                                                                                                                                                   |
|--------------------------|---------------------------|--------------------------------------------------------------------------------------------------------------------------------------------------------------------------------------------------------------------------------------------------------------------------------------------------------------------|
| IVIG                     | KW                        | <ul style="list-style-type: none"> <li>Decrease of fever within 36 hours</li> </ul>                                                                                                                                                                                                                                |
| IVIG                     | ITP                       | <ul style="list-style-type: none"> <li>Platelet count reaches 20000/L within hospitalization</li> </ul>                                                                                                                                                                                                            |
| IVIG                     | AIHA                      | <p>One of the following two criteria</p> <ul style="list-style-type: none"> <li>Hemoglobin <math>\geq</math> 8 g/dL before discharge</li> <li>Hemoglobin increase <math>&gt;</math> 2 g/L before discharge</li> </ul> <p>Able to be discharged with approval from physician</p>                                    |
| IVIG                     | HLH                       | <p><i>Note: Since HLH is a life-threatening condition, patients who cannot be discharged are likely to die during that hospitalization.</i></p>                                                                                                                                                                    |
| IVIG                     | GBS                       | <p>One of these two criteria</p> <ul style="list-style-type: none"> <li>Off endotracheal (ET) tube</li> <li>Increased muscle function</li> </ul> <p><i>Note: Most patients are admitted with severe and progressive weakness. Therefore, muscle function is usually assessed and documented in the record.</i></p> |
| IVIG                     | MG                        | <ul style="list-style-type: none"> <li>Off ET tube</li> </ul>                                                                                                                                                                                                                                                      |
| IVIG                     | PV                        | <p>One of the following two criteria</p> <ul style="list-style-type: none"> <li>No <u>new</u> skin and/or mucosal lesions within a period of treatment</li> <li>Decrease of skin involvement by 30% compared with baseline</li> </ul>                                                                              |
| Liposomal amphotericin B | Invasive fungal infection | <ul style="list-style-type: none"> <li>Discharged alive</li> </ul>                                                                                                                                                                                                                                                 |

KW: Kawasaki disease; ITP: Idiopathic thrombocytopenic purpura; AIHA: Autoimmune hemolytic anemia; HLH: Hemophagocytic lymphohistocytosis; GBS: Guillain-Barré syndrome; MG: Myasthenia gravis crisis; PV: Pemphigus vulgaris
